# Supplementary material
Source: publisher site journal article supplement (https://www.dovepress.com/article/159621)
Supplement: Supplementary file 1 [file get_supplementary_file.php]

## Moderation analysis

The moderation model considered OHS (DMT) as *independent variable* and OHIP as *dependent variable*, with HUDBI as the *moderator*.

```

*****
Model = 1
  Y = ZOHIP
  X = ZDMT
  M = zD_x_zHU

Sample size
  191

*****
Outcome: ZOHIP

Model Summary
      R      R-sq      MSE      F      df1      df2      p
    .3330    .1109    .9034    5.9307    3.0000    187.0000    .0007

Model
      coeff      se      t      p      LLCI      ULCI
constant    -.0130    .0714    -.1816    .8561    -.1539    .1279
zD_x_zHU     .2758    .1072    2.5714    .0109    .0642    .4873
ZDMT         .2905    .0986    2.9459    .0036    .0959    .4850
int_1      -.0989    .0816    -1.2123    .2269    -.2598    .0620

Product terms key:
  int_1    ZDMT      X    zD_x_zHU

R-square increase due to interaction(s):
      R2-chng      F      df1      df2      p
int_1      .0212    1.4698    1.0000    187.0000    .2269

*****

Conditional effect of X on Y at values of the moderator(s):
      zD_x_zHU      Effect      se      t      p      LLCI      ULCI
    -1.0889      .3981    .1038    3.8371    .0002    .1934    .6028
     .0000      .2905    .0986    2.9459    .0036    .0959    .4850
     1.0889      .1828    .1564    1.1689    .2439    -.1257    .4913

Values for quantitative moderators are the mean and plus/minus one SD from
mean.
Values for dichotomous moderators are the two values of the moderator.

```

According to the results from PROCESS, the overall moderation model had significant effects  $F(3, 187) = 5.93, p < .001$ . However, the overall interaction effect was not significant:  $C.I. = -.26 \div .06$ . We further used the Johnson-Neyman<sup>1</sup> technique to probe for interaction and to identify ranges of values of the moderator for which the interaction effect is significant. Hayes' PROCESS macro for SPSS<sup>2</sup> incorporates the Johnson-Neyman technique<sup>3</sup>.

\*\*\*\*\* JOHNSON-NEYMAN TECHNIQUE \*\*\*\*\*

Moderator value(s) defining Johnson-Neyman significance region(s)

| Value | % below | % above |
|-------|---------|---------|
| .5158 | 75.3927 | 24.6073 |

Conditional effect of X on Y at values of the moderator (M)

| zD_x_zHU | Effect | se    | t      | p     | LLCI    | ULCI   |
|----------|--------|-------|--------|-------|---------|--------|
| -4.4882  | .7342  | .3399 | 2.1604 | .0320 | .0638   | 1.4047 |
| -3.9709  | .6831  | .2994 | 2.2814 | .0237 | .0924   | 1.2737 |
| -3.4536  | .6319  | .2595 | 2.4349 | .0158 | .1199   | 1.1439 |
| -2.9364  | .5808  | .2205 | 2.6339 | .0091 | .1458   | 1.0158 |
| -2.4191  | .5296  | .1829 | 2.8961 | .0042 | .1689   | .8904  |
| -1.9019  | .4785  | .1477 | 3.2387 | .0014 | .1870   | .7700  |
| -1.3846  | .4274  | .1174 | 3.6416 | .0004 | .1958   | .6589  |
| -.8674   | .3762  | .0963 | 3.9065 | .0001 | .1862   | .5662  |
| -.3501   | .3251  | .0913 | 3.5603 | .0005 | .1450   | .5052  |
| .1672    | .2739  | .1047 | 2.6168 | .0096 | .0674   | .4804  |
| .5158    | .2394  | .1214 | 1.9727 | .0500 | .0000   | .4789  |
| .6844    | .2228  | .1309 | 1.7017 | .0905 | -.0355  | .4810  |
| 1.2017   | .1716  | .1639 | 1.0469 | .2965 | -.1518  | .4951  |
| 1.7189   | .1205  | .2004 | .6011  | .5485 | -.2749  | .5159  |
| 2.2362   | .0693  | .2388 | .2904  | .7719 | -.4018  | .5405  |
| 2.7535   | .0182  | .2783 | .0654  | .9479 | -.5308  | .5672  |
| 3.2707   | -.0329 | .3185 | -.1034 | .9177 | -.6612  | .5953  |
| 3.7880   | -.0841 | .3591 | -.2341 | .8151 | -.7925  | .6244  |
| 4.3052   | -.1352 | .4001 | -.3380 | .7357 | -.9245  | .6540  |
| 4.8225   | -.1864 | .4413 | -.4224 | .6732 | -1.0569 | .6841  |
| 5.3398   | -.2375 | .4826 | -.4921 | .6232 | -1.1896 | .7146  |
| 5.8570   | -.2887 | .5241 | -.5508 | .5825 | -1.3226 | .7453  |

\*\*\*\*\*

\* the values corresponding to the identified regions of significance are show above, in blue.

One such region of significant moderation, from -4.49 to .52 values of HUDI (in z-scores) was identified. The moderation effect was graphically depicted in Figures 4 and 5, in the main text, and showed that the moderator HUDBI strengthened the positive relation between DMT and OHIP, for the regions of significance indicated by the Johnson-Neyman technique.

1. Johnson PO, Neyman J. Tests of certain linear hypotheses and their application to some educational problems. *Statistical research memoirs*. 1936;1:57-93.
2. Hayes AF. PROCESS: A versatile computational tool for observed variable mediation, moderation, and conditional process modeling. 2012. <http://www.afhayes.com/public/process2012.pdf>.
3. Hayes AF, Matthes J. Computational procedures for probing interactions in OLS and logistic regression: SPSS and SAS implementations. *Behavior research methods*. 2009;41(3):924-936.
